1 **The contribution of the European LIFE program to mitigate damages**  
2 **caused by large carnivores in Europe**

3 Teresa Oliveira<sup>1</sup>, Adrian Treves<sup>2</sup>, José Vicente López-Bao<sup>3</sup>, Miha Krofel<sup>1,\*</sup>

4 <sup>1</sup> Department of Forestry, Biotechnical Faculty, University of Ljubljana, Večna pot 83,  
5 SI-1000 Ljubljana, Slovenia

6 <sup>2</sup> Nelson Institute for Environmental Studies, University of Wisconsin-Madison,  
7 30A Science Hall, 550 North Park St., Madison, WI 53706, USA

8 <sup>3</sup> Research Unit of Biodiversity (CSIC/Oviedo University/Regional Government of  
9 Asturias), Oviedo University, E-33600 Mieres, Spain

10 \* corresponding author: Miha Krofel, [miha.krofel@gmail.com](mailto:miha.krofel@gmail.com), Department of Forestry,  
11 Biotechnical Faculty, University of Ljubljana, Večna pot 83, SI-1000 Ljubljana,  
12 Slovenia

13 **Abstract**

14 Governments around the world invest considerable resources to reduce damages caused  
15 by large carnivores on human property. To use these investments more efficiently and  
16 effectively, we need to understand which interventions successfully prevent such  
17 damages and which do not. In the European Union, the LIFE program represents by far  
18 the largest financial instrument to help EU Member States with the implementation of  
19 conservation activities, including mitigation of damages caused by large carnivores.  
20 However, we currently lack information about the effectiveness of this funding program  
21 in reducing carnivore damages. We reviewed 135 LIFE projects dealing with large  
22 carnivores between 1992 and 2019 to provide an overview of the use of damage  
23 prevention methods and evaluate their functional and perceived effectiveness. Methods

24 evaluated ranged from non-lethal and lethal interventions, to information dissemination  
25 and compensation schemes. The largest number of the projects was focused on grey  
26 wolf (*Canis lupus*) and brown bears (*Ursus arctos*) in the Mediterranean countries and  
27 in Romania. Electric fences were reported as the most successful method for reducing  
28 damages by large carnivores, and most of the non-lethal methods used showed at least  
29 moderate effectiveness. However, standards of measuring and reporting effectiveness  
30 were in general relatively low, which limits our ability to measure actual impact.  
31 Therefore we urge project managers and evaluators to improve these standards, as well  
32 as the dissemination of the project results. We provide a list of recommendations for  
33 improving measuring and reporting success of implemented interventions for the benefit  
34 of future projects aimed to reduce damages caused by wildlife.

35

### 36 **Article impact statement**

37 Electric fences were reported as the most effective method to prevent large-carnivore  
38 damages and are recommended for future use.

39

### 40 **Introduction**

41 The predatory behavior of large carnivores, threatening livestock, pets and,  
42 sometimes, human safety, often represent the main factor opposing the landscape-  
43 sharing approach to coexist with these species (López-Bao et al., 2017; Treves &  
44 Karanth, 2003; van Eeden et al., 2018; Woodroffe et al., 2005). In Europe, the last  
45 decades were marked by a recovery of large carnivore populations (Chapron et al.,  
46 2014) which in many areas lead into an increase of damage caused to livestock and

47 other human properties (Bautista et al., 2019; Fernandez-Gil et al., 2016; Hovardas,  
48 2018; Musiani et al., 2003). Areas where large carnivores have been absent for several  
49 decades or centuries are often particularly sensitive to conflict situations, due to lack of  
50 experiences in coexistence with predators and disuse of traditional methods to prevent  
51 damages (Salvatori & Mertens, 2012; López-Bao et al., 2017). Therefore, the  
52 recolonization of former territories is raising challenging conservation issues, including  
53 damages, fear for personal safety, as well as conflicts between different interest groups  
54 on how to conserve large carnivores (Boitani & Linnell, 2015; Hovardas & Marsden,  
55 2018; Treves et al., 2004). While some groups are concerned with carnivore  
56 conservation and welcome their recolonization, others (e.g. farmers and livestock  
57 owners) are distressed due to damages they already suffered or may suffer (Hovardas,  
58 2018) and the need for additional work required for preventing these damages.  
59 Nevertheless, despite several different interests, there is often a common goal towards  
60 which all of these groups strive, i.e. reduction of human-carnivore conflicts.

61 Governments around the world invest considerable logistical and budgetary  
62 resources in finding win-win solutions for carnivore restoration and long-term  
63 preservation at the same time as protecting agricultural incomes and safety of domestic  
64 animals and people (Carter & Linnell, 2016; Chapron et al., 2014; Ripple et al., 2014;  
65 Van Eeden et al. 2018). Those investments would be used more efficiently and  
66 effectively if we knew which interventions achieved which of those two goals, if any,  
67 and how they did so (Treves et al. 2019). Several damage mitigation methods (hereafter,  
68 DMMs) are applied with the attempt of reducing damages caused by large carnivores  
69 and facilitating the coexistence between carnivores and humans (Dickman, 2010;  
70 Woodroffe et al., 2005). These methods can be generally grouped in two main  
71 categories: reactive and proactive. Reactive DMMs include, for example, a large part of

72 damage compensations schemes aimed to mitigate the economic burdens for livestock  
73 owners after they report an attack (e.g., Bautista et al., 2019; Giannuzzi-Savelli et al.,  
74 1997; Ravenelle & Nyhus, 2017), while proactive DMMs aim at preventing damages  
75 before they occur, such as electric fences and the use of carnivore-proof garbage bins, to  
76 reduce the access to anthropogenic food by carnivores (Linnell et al., 1996; Shivik et al.,  
77 2003; Van Eeden et al., 2018). However, due to the high variety of socio-ecological  
78 contexts in which damages occur, each situation should be considered carefully before  
79 applying any type of DMM (Hovardas & Marsden, 2018; Treves et al., 2009; van Eeden  
80 et al., 2018).

81         The choice of a DMM to be implemented should primarily rely on its  
82 effectiveness for achieving an explicit outcome (Treves et al., 2016, 2019; van Eeden et  
83 al., 2018). Effectiveness of DMM can be assessed from two stand-points: perceived and  
84 functional. While the first considers qualitative self-assessments (i.e., subjective  
85 perception of effectiveness of given practice (Ohrens et al., 2019; Treves et al., 2019),  
86 the latter considers a quantitative and measurable approach (i.e., an actual measured  
87 reduction or increment in damages, retaliations, or other physical manifestation of  
88 conflicts; Treves et al., 2016, Eklund et al. 2017). Since perceived effectiveness is less  
89 reliable and can differ considerably from functional effectiveness (Ohrens et al. 2019),  
90 relying solely on perceived effectiveness might lead to a suboptimal choice of DMM  
91 (Treves et al., 2009, 2019). However, despite the fact that numerous academic studies,  
92 conservation projects and management strategies recommend or implement DMMs, our  
93 knowledge on their functional effectiveness under different conditions is still  
94 surprisingly limited (Eklund et al., 2017; Miller et al., 2016; Treves et al., 2019, 2016;  
95 Van Eeden et al., 2018). A careful evaluation of the effectiveness of each DMM  
96 applied, as well as a clear and unbiased reporting of the results, is essential to obtain

97 sound information on the best method to be implemented in each context, and to create  
98 particular guidelines. This is especially important for funding programs that aim to  
99 support coexistence between people and large carnivores at large spatial scales (Van  
100 Eeden et al. 2018).

101 In 1992, the European Commission initiated the LIFE program (*L'Instrument*  
102 *Financier pour L'Environnement*; <https://ec.europa.eu/easme/en/life>) as a financial  
103 instrument to help EU Member States with the implementation of conservation actions.  
104 It is currently by far the largest funding program dedicated to nature and environment  
105 (€5.45 billion is planned for the next 6-year cycle, 2021-2027;  
106 <https://ec.europa.eu/easme/en/section/life/life-history-life>). A large part of the program  
107 is dedicated to conserving and managing habitats and species, according to the EU's  
108 directives on birds and habitats, and gives priority to strictly protected species (e.g.,  
109 Annex IV in the Habitats Directive) and the Natura 2000 network  
110 ([https://ec.europa.eu/environment/nature/index\\_en.htm](https://ec.europa.eu/environment/nature/index_en.htm)).

111 The three largest and most widespread species of carnivores in Europe (grey  
112 wolf, *Canis lupus*; Eurasian lynx, *Lynx lynx*; brown bear, *Ursus arctos*) are listed as  
113 priority species for the LIFE program and feature prominently among the species aimed  
114 by the LIFE projects. Among them, many have implemented a broad number of  
115 interventions aimed at mitigating human-carnivore conflicts, both proactive and  
116 reactive, from the distribution of electric fences to outreach activities (see below).  
117 Although LIFE projects started with projects conducted at national level, there has been  
118 steady increase in transboundary projects (e.g., Salvatori & Mertens, 2012) because  
119 most large carnivore populations in Europe are transboundary (Boitani et al., 2015;  
120 Chapron et al., 2014; Linnell et al., 2008). So far, €88 million have already been  
121 provided to projects that included mitigation of damages caused by bears, wolves and

122 lynx (plus additional €36 million granted to ongoing projects). However, although large  
123 funds have been invested, we currently lack information about the effectiveness of the  
124 interventions implemented under this funding program to reduce human-carnivore  
125 conflicts. Without such knowledge, it is difficult to evaluate the success of the LIFE  
126 program in improving human-carnivore coexistence, as well as to provide  
127 recommendations for future efforts.

128         Here, we reviewed the completed and on-going LIFE projects dealing with large  
129 carnivore species in Europe over the past 28 years (1992-2019) with the aim to i)  
130 synthesize the use of DMMs within LIFE projects, ii) evaluate the trends in the  
131 promotion of DMMs within this program (by carnivore species and biogeographical  
132 area) and iii) evaluate the perceived and functional effectiveness of the interventions  
133 adopted in reducing human-carnivore conflicts. To our knowledge, this is the first study  
134 to provide a critical evaluation of the contribution of the LIFE program to reduce  
135 human-carnivore conflicts across Europe. Based on our results and information  
136 available, we developed recommendations for future efforts to facilitate human-wildlife  
137 coexistence, and to improve the standards of measuring the functional effectiveness of  
138 these interventions. We also identify deficiencies in reporting on effectiveness of  
139 implemented DMM and provide recommendations for improving dissemination of  
140 results for the benefit of the future projects and research.

## 141 **Methods**

### 142 *Review of Projects*

143 We compiled a database with projects from the LIFE's database containing all  
144 completed and on-going projects between 1 January 1992 and 30 June 2019  
145 (<http://ec.europa.eu/environment/life/project/Projects/index.cfm>). The search included

146 the subtheme “Mammals” within the theme “Species”. We manually checked the  
147 summary of each LIFE project and selected those that mentioned any species of large  
148 carnivores and noted whether the project included implementation of at least one DMM.  
149 When the project summary was ambiguous about the use of DMMs, we checked the  
150 final report or a similar document, as well as the project’s webpage (when existing), to  
151 verify whether DMMs were used or not. We first retrieved general information about  
152 the project: 1) leading country, 2) target carnivore species, and 3) whether DMMs were  
153 implemented.

154 Then, for the projects including DMMs, we extracted information about 4) the type of  
155 DMM considered (Appendix S1), 5) effort, 6) functional and 7) perceived effectiveness  
156 (see below for details). As effort we considered the investment in the DMM (e.g. in  
157 terms of time, equipment, damage objects, costs), which can be relevant for  
158 comparisons of effectiveness among projects. For this section, we considered only  
159 completed projects. Although we first included all large carnivore species in Europe in  
160 our search, in the end we only evaluated projects including brown bears, grey wolves,  
161 and Eurasian lynx, because we found no completed LIFE project involving wolverine  
162 (*Gulo gulo*), and the reports of the projects involving the Iberian lynx (*Lynx pardinus*)  
163 did not include any DMM (probably because this species is rarely associated with  
164 damages caused to human property; Garrote et al., 2013).

### 165 *Categorization of mitigation practices*

166 We first randomly selected a subset of projects ( $n = 35$ ) and screened the final project  
167 reports to the EU, to identify the most commonly used DMMs. Based on this initial  
168 screening, we defined the following categories of DMMs (definition for each category  
169 is provided in Appendix S1): Large carnivore emergency teams (LCET), Information

170 dissemination, Damage compensation schemes, Visual and sound deterrents, Electric  
171 fences, Physical barriers, Preventing access to anthropogenic food sources,  
172 Improvement of agricultural/farming practices, Increasing food availability for  
173 carnivores, Livestock guarding dogs (LGDs), Livestock guarding people (Shepherds),  
174 and Predator removal. In some cases, when the final report was not available, the goal  
175 of the information dissemination activities was not clear (i.e. we could not determine  
176 whether it was limited to education about carnivore ecology, status, conservation etc., or  
177 if it also included information about conflict prevention and DMMs applied within the  
178 project). In these cases, if the project summary mentioned the use of information  
179 dissemination and DMMs were conducted within the project, we assumed that those  
180 activities included dissemination of information on DMMs. For damage compensation  
181 schemes, we only considered cases in which the project was somehow related to this  
182 action (e.g. the project paid the compensation or if it changed or adapted the  
183 compensation scheme in the project area).

#### 184 *Evaluating functional and perceived effectiveness*

185 The methods used for the evaluation of effectiveness per DMM varied considerably  
186 among projects, thus data was not collected in a standardized way. For example, some  
187 projects reported only damage reduction in terms of number of animals killed before  
188 and after the implementation of an intervention, while others only reported the reduction  
189 in number of sheep folds affected. This variability in methodology prevented us from  
190 being able to directly compare effectiveness of different DMMs or to explore the  
191 relationship between effectiveness and additional factors, such as effort invested.  
192 Therefore, we conducted a two-step categorization to measure functional and perceived  
193 effectiveness of each DMM.



194 First, we extracted the reported functional and perceived effectiveness for given DMM  
195 from each project report. For data on functional effectiveness, we only considered  
196 reports, where comparison with a time period before the implementation was provided,  
197 i.e. before-and-after comparison also known as a silver standard of evidence (Treves et  
198 al., 2019). Functional effectiveness was usually provided as a value (e.g., the attacks in  
199 a given pasture were reduced by 55% after the deployment of electric fences compared  
200 to same period before the project), whereas perceived effectiveness was mostly reported  
201 qualitatively by the beneficiaries (e.g., owners considered electric fences to be very  
202 effective at reducing attacks in treated pastures). To enable comparison, we categorized  
203 the quantitative data in four categories: non-effective (no detectable difference in  
204 before-and-after comparisons), 1–25% reduction in damages caused by large carnivores,  
205 26–75% reduction, and 76–100% reduction. For perceived effectiveness, we used the  
206 following qualitative classes based on descriptions available: none, medium, high, and  
207 very high effectiveness.

208 Secondly, we assessed the overall perceived and functional effectiveness of each DMM  
209 used in LIFE projects (all projects pooled). If more than 50% of the projects using a  
210 given DMM had reported 76-100% functional effectiveness for a given DMM and none  
211 reported it to be non-effective or counterproductive, then we classified that method as  
212 “Highly Effective”. A similar approach was applied when evaluating perceived  
213 effectiveness, where a DMM was considered to be perceived as “Highly Effective”  
214 when it was evaluated as having very high effectiveness in more than 50% of the  
215 projects and in none as being not-effective. “Effective” methods were those evaluated as  
216 “76-100%” or “very high” in  $\leq 50\%$  of the projects, and the remaining as having less  
217 than 75% functional effectiveness or “medium” and “high” perceived effectiveness,  
218 respectively. When more than 50% of the projects found given DMM to be non-

219 effective in terms of functional or perceived effectiveness, we classified it as “Not  
220 Effective”. We classified the method as having “mixed results”, if a single project had  
221 reported a given DMM as having non-effective functional effectiveness (or “none”  
222 perceived effectiveness), while the other projects reported it to have higher functional  
223 (or perceived) effectiveness.

224

## 225 **Results**

226 Overview of the use of damage mitigation methods within LIFE projects

227 We retrieved information from a total of 263 LIFE projects focused on mammals, and,  
228 among them, more than half involved at least one species of large carnivore (n = 135).

229 Most LIFE projects targeting large carnivores included at least one DMM (64%, n = 87,  
230 Fig. 1). From these, 74 projects were concluded by June 2019, while the remaining 13  
231 were still in progress.

232 Overall, the most frequently used DMM was dissemination of information to the  
233 stakeholders (conducted in 92% of the projects), followed by implementing electric  
234 fences (either fixed or mobile), which were used in 47% of the projects (Table 1). Other  
235 DMMs included, in decreasing order of use: improvement or implementation of damage  
236 compensations schemes, use of livestock guarding dogs (LGDs), and increasing food  
237 availability for carnivores, which were applied in 30-50% of the projects. The remaining  
238 DMMs were used infrequently, i.e. with < 25% of projects applying them (Table 1).

239 We observed similar general patterns when individual species were considered  
240 separately. Notable exceptions were the development of LCETs and bear-proof garbage  
241 bins for preventing conflicts with bears (17% and 10% of the LIFE projects targeting

242 bears, respectively; Table 1). As only few of the concluded projects included Eurasian  
243 lynx, and all of them included also other large carnivore species, it was not possible to  
244 see any pattern particular to lynx in the frequency of DMM use (Table 1).

#### 245 *Effectiveness of damage mitigation methods*

246 We observed a surprising lack of information about the functional and perceived  
247 effectiveness of DMM, which were reported only for 14% and 31% of the concluded  
248 projects involving DMM (n= 74), respectively. Also, data on the effort spent for their  
249 implementation was limited (completely lacking in 39% of project reports), and differed  
250 significantly among projects (e.g. number of electric fences distributed per sheep fold or  
251 only number of sheep folds that got electric fences). Therefore, we could not compare  
252 effort and its influence on effectiveness in subsequent analyses.

#### 253 *Functional effectiveness*

254 Information on functional effectiveness was not available in any of the reports for  
255 several of the DMMs (LCET, information dissemination, damage compensation  
256 schemes, improvement of agricultural practices, increasing food availability for  
257 carnivores, shepherds), and it was most often reported for electric fences (n = 13; Fig.  
258 2).

259 Electric fences appear to be the most effective DMM for reducing damages according to  
260 the available information; in most of the reported cases their effectiveness was >75%  
261 (i.e. highly successful; Fig. 2). High success was reported also for physical barriers,  
262 visual/sound deterrents, and preventing access to anthropogenic food resources,  
263 although sample sizes were much lower for these DMMs (n = 1-2; Fig. 2). LGDs were  
264 considered to have medium effectiveness (26–75%; n = 3; Fig. 2), while predator

265 removal was deemed ineffective, as attacks were not reduced after culling of wolves,  
266 although this was evaluated only in a single case (Fig. 2).

### 267 *Perceived effectiveness*

268 For perceived effectiveness, two types of DMMs lacked data (improvement of  
269 agricultural practices and predator removal; Fig. 2). Information dissemination obtained  
270 the highest number of reports (n = 32), followed by electric fences, which were  
271 evaluated 27 times. Perceived effectiveness for the remaining DMMs was reported less  
272 frequently, with 10 or less projects reporting for each method.

273 DMMs perceived as being most effective included electric fences, LGDs, shepherds and  
274 visual/sound deterrents. Physical barriers, preventing access to anthropogenic food  
275 sources, and damage compensation were perceived as effective, while the rest were  
276 considered to be non-effective or giving mixed results (Fig. 2).

277

## 278 **Discussion**

279 LIFE projects invest considerable resources in supporting wildlife management and  
280 conservation actions in Europe, including actions aimed to address human-wildlife  
281 conflicts. Our overview revealed considerable bias in the distribution and number of  
282 projects targeting large carnivores in certain parts of Europe, which does not reflect  
283 current distribution of large carnivores on this continent (Chapron et al., 2014; Cimatti  
284 et al., 2021). We observed a clear north-south gradient, with a very small number of  
285 projects in northern Europe, although these countries harbor important proportion of  
286 entire European populations of large carnivores. Most LIFE projects aimed to mitigate  
287 damages caused by these species have been conducted in the Mediterranean countries

288 (Portugal, Spain, Italy and Greece) and Romania. We also observed a bias between  
289 eastern and western countries, with a lower number of projects conducted in the East  
290 (Romania being a notable exception). Reasons for observed bias in the spatial  
291 distribution of LIFE projects are not evident from data available, but we assume that the  
292 lower number of projects in northern countries might be connected with higher national  
293 budgets available for large carnivore management, research and conflict prevention in  
294 these countries, compared to Southern and Eastern Europe, where the need for EU funds  
295 is higher. A lower number of projects in Eastern Europe compared to Western Europe  
296 could be partly explained by their later accession to the European Union. A large  
297 number of LIFE projects in Romania might be connected with large populations of three  
298 species of large carnivores (wolf, bear, and Eurasian lynx) in this country (Chapron et  
299 al. 2014). An exceptionally high number of projects in Italy and Spain can be partly  
300 explained by several LIFE projects developed during the 1990's, which were divided in  
301 two- or three-phased projects. Although they had the same goals and location, each  
302 phase was officially a separate project. Nevertheless, even if we had considered such  
303 multi-phase projects as a single project, Italy and Spain would still stand out as  
304 countries with the highest number of LIFE projects on large carnivores.

305 Our overview also revealed considerable differences between the numbers of projects  
306 dedicated to each species, especially a low number of projects dedicated to mitigation of  
307 damages caused by Eurasian lynx. Eurasian lynx is the least numerous among the  
308 treated taxa in Europe (Chapron et al. 2014), and is generally causing considerably less  
309 conflicts compared to wolf or bear (Bautista et al., 2019; Kaczensky, 1999), therefore  
310 there was probably less need for the application of DMM for this species, which is  
311 reflected in lower number of such projects. An exception is Northern Europe, where  
312 damage caused by lynx is frequent, especially where sheep graze without any protection

313 (Odden et al., 2008). However, as noted above, number of LIFE projects was generally  
314 low in this region.

315 Despite the considerable funds provided through the LIFE program to EU Member  
316 States to help mitigate damages caused by large carnivores to human property, several  
317 limitations surfaced when we tried to measure their actual impact on economic losses to  
318 carnivores. This was mainly related to the availability and quality of the reported data.  
319 First, only 30 out of 74 projects made the final reports available, which limited the  
320 amount of information we could gather about the methods applied, their effort and  
321 effectiveness. The number of reports available was particularly low for the projects  
322 conducted in the 1990's, as most of the documents were lost over the years. Therefore,  
323 the only information available from these projects was that provided in the project  
324 summary from the LIFE webpage, which was fairly limited, especially concerning the  
325 effort of each DMM and their effectiveness. Second, when the project reports were  
326 available, we observed that standards of measuring functional effectiveness were in  
327 general relatively low, with considerable inconsistencies in measurements. They were  
328 mostly limited to before-after comparison with non-random selection of treated  
329 locations, which does not provide strong inference when evaluating success of DMMs  
330 (Treves et al. 2019). This is mainly connected with several potential confounding  
331 factors that could affect the results and potential biases involved in evaluating  
332 effectiveness of interventions. For this reason, researchers recommend using at least a  
333 quasi-experimental approach, which in addition to treated locations or objects also  
334 includes randomly-selected controls (Treves et al., 2019). In most cases it was also not  
335 possible to discern potential biases involved in selection, treatment, measurement, and  
336 reporting. Furthermore, LIFE projects rarely reported the duration of the effect,  
337 although this is a crucial parameter that can considerably limit the success of DMMs,

338 especially when long-term solutions are attempted to achieve (Khorozyan & Waltert,  
339 2019). Although some DMMs, such as those involving pain stimuli (e.g. electric  
340 fences), can provide long-lasting solutions, effectiveness of others (e.g. various  
341 deterrents) often erode after few months (Khorozyan & Waltert, 2019).

342 Because of these limitations, our capacity to properly evaluate many of the used  
343 methods and provide sound guidelines was greatly limited. This limits the ability to  
344 adapt methods and increase success of conflict prevention in the most important  
345 conservation program in the European Union. However, this issue is not limited to LIFE  
346 projects, and recent reviews have pointed out a general lack of reliable information on  
347 the effectiveness of methods used to mitigate the damage caused by large carnivores  
348 (Treves et al., 2016, 2019; Eklund et al., 2017; Van Eeden et al., 2018).

349 In spite of the limitations presented above, we believe that the data on functional and  
350 perceived effectiveness of used DMMs does provide certain insights that could benefit  
351 future endeavors to reduce conflicts between people and large carnivores. The first  
352 conclusion is that most of the non-lethal methods showed at least moderate  
353 effectiveness (judged using both functional and perceived effectiveness), which is in  
354 agreement with previous studies (Berzi et al., 2021; Khorozyan & Waltert, 2020;  
355 Salvatori & Mertens, 2012; Treves et al., 2016; van Eeden et al., 2018). Sample size for  
356 several of these methods was, however, too small to be able to recommend them for  
357 widespread use in the future before more data becomes available. The only method that  
358 was tested more frequently (n=13) and was mostly reported as being highly effective,  
359 are electric fences. Based on this, it appears safe to recommend continued use of electric  
360 fences also for future projects, which also supports previous research done on the  
361 functional effectiveness of this method (Van Eeden et al. 2018; Khorozyan & Waltert,  
362 2019, 2020). The sample size for actions related to the lethal removal of large

363 carnivores evaluated within the LIFE program was too small and limited to only one  
364 species (grey wolf) and one case, as to be able to make any generalizations.

365 Several other factors beside the type of DMM used can affect occurrence of damage  
366 caused by carnivores on human property. One of the crucial ones is appropriate use and  
367 application of these measures (Frank & Eklund, 2017). For instance, electric fences  
368 require regular maintenance in the field to ensure their effectiveness. Some projects  
369 reported reduced effectiveness when fences were damaged or not set properly (e.g.,  
370 improper grounding or too small fence circumference in respect to the sheep herd size  
371 or number of beehives to be protected). Livestock guarding dogs can be quite effective  
372 as well, but require proper training and can be expensive (registration, veterinary  
373 assistance). Additionally, several projects reported incompatibilities between the  
374 shepherd and the animal, so they were returned to the breeder. This points to the  
375 importance of close partnership with the livestock owners and communication on how  
376 to properly maintain DMMs, which was essential part of several successful LIFE  
377 projects.

378 Social and environmental context can also affect the effectiveness of measures used to  
379 prevent human-carnivore conflicts (Graha et al., 2005; Krofel et al. 2020). For example,  
380 availability of natural prey can be a critical factor, as reduced abundance might increase  
381 predators' attempts to approach human settlements or livestock, although areas with  
382 higher prey density might also attract predators or increase their density, sometimes  
383 leading to increase in attacks on livestock (Janeiro-Otero et al., 2020; Treves et al.,  
384 2004). Other factors reported as important in previous research include the effects of  
385 surrounding habitat (e.g. distance to forest; Treves et al., 2011), meteorological  
386 conditions (Towns et al., 2009), breed of domestic animals (Bassi et al., 2021), herd size  
387 (Dar et al., 2009), status of local carnivore populations (e.g. stability of wolf packs;



388 (Imbert et al., 2016; Santiago-Avila et al., 2018), historic presence of large carnivores in  
389 the area (Linnell, 2013), carnivores' space use (Melzheimer et al., 2020) and their  
390 habituation to human presence (Majić & Krofel, 2015). Due to small sample sizes and  
391 limited availability of such information in LIFE project reports, we were not able to  
392 evaluate these effects on the effectiveness of prevention measures used in these projects.  
393 Nevertheless, these aspects should not be disregarded in future research, when more  
394 data becomes available.

### 395 *Recommendations for future projects*

396 Considering the current limited amount of information and the high investments made  
397 across Europe under the LIFE program for reducing damage caused by large carnivores  
398 to human property, we call for higher standards in measuring effectiveness of DMM  
399 within LIFE projects, and similar programs. This will be especially important with the  
400 evaluation of novel, untested methods that might be applied in the future.

401 Specifically, our main recommendations for the future LIFE and other similar projects  
402 that include conservation actions aimed at mitigating damages to human property are: 1)  
403 provide clear methodology how functional and perceived effectiveness was evaluated;  
404 2) prioritize measuring functional effectiveness, which is superior to measures of  
405 perceived effectiveness because of the problem of the placebo effect and the problem of  
406 researcher bias in encouraging positive responses by participants (Ohrens et al. 2019);  
407 3) include randomly-selected control sites, where damages are measured in the same  
408 way as at treated sites, if possible with cross-over design (Treves et al., 2019); 4) report  
409 effectiveness for each DMM separately; 5) clearly indicate the investment made  
410 associated with every DMM (i.e. report budget, number of farms included, etc.); and 6)  
411 report any potential selection, treatment, measurement or reporting biases (Treves et al.,

412 2019). We believe these recommendations would represent a major benefit for future  
413 LIFE projects, as well as other efforts of reducing conflicts between people and  
414 carnivores.

415 Additional information that would be useful to enable better evaluation of potential  
416 factors influencing effectiveness of implemented methods, include population status of  
417 large carnivores in the area (including pack stability in case of wolves), historic  
418 presence of large carnivores in project area (e.g. whether the area was recently re-  
419 colonized or populations have never been exterminated), prey availability in project  
420 area, habitat characteristics (especially distance to forest for treated and control sites),  
421 and time period over which given method was applied and effects were measured.

422 We also advise more efforts focused on regions and species that have been so far largely  
423 neglected in LIFE projects, especially where funding from other sources is limited or  
424 when the complexity of bureaucratic procedures is deterring the owners from requesting  
425 assistance in damage prevention (Berzi et al., 2021). This includes several parts of the  
426 Central and Eastern Europe, and areas where damages caused by the Eurasian lynx  
427 represent significant issue locally.

428

## 429 **Supporting Information**

430 Categories of DMMs and definition for each category is provided in Appendix S1.

## 431 **Acknowledgments**

432 We are grateful to the teams of EuroLargeCarnivores Project and NEEMO Monitoring,  
433 especially R. Hickisch and J. Sliva, for their help in providing useful contacts and  
434 information on LIFE projects, which helped us to improve the database, especially for

435 older projects. The study was funded by the European Union as part of the  
436 EuroLargeCarnivores LIFE project (grant number LIFE16 GIE/DE/000661). JVLB was  
437 additionally supported by the Spanish Ministry of Economy, Industry and  
438 Competitiveness (RYC-2015-18932; CGL2017-87528-R AEI/FEDER EU). MK  
439 was additionally supported by the Slovenian Research Agency (grants P4-0059 and N1-  
440 0163).

441

## 442 **Literature Cited**

- 443 Bassi, E., Pervan, I., Ugarković, D., Kavčič, K., Maksan, M. T., Krofel, M., & Šprem,  
444 N. (2021). Attacks on hunting dogs: the case of wolf–dog interactions in Croatia.  
445 *European Journal of Wildlife Research*, 67(1), 1–9.
- 446 Bautista, C., Revilla, E., Naves, J., Albrecht, J., Fernández, N., Olszańska, A., Adamec,  
447 M., Berezowska-Cnota, T., Ciucci, P., & Groff, C. (2019). Large carnivore damage  
448 in Europe: Analysis of compensation and prevention programs. *Biological  
449 Conservation*, 235, 308–316.
- 450 Berzi, D., Cerri, J., Musto, C., & Zanni, M. L. (2021). Use of European Funds and Ex  
451 Post Evaluation of Prevention Measures against Wolf Attacks (*Canis lupus  
452 italicus*) in the Emilia-Romagna Region (Italy). *Animals*, 11(6), 1536.
- 453 Boitani, L., Alvarez, F., Anders, O., Andren, H., Avanzinelli, E., Balys, V., Blanco, J.  
454 C., Breitenmoser, U., Chapron, G., & Ciucci, P. (2015). Key actions for large  
455 carnivore populations in Europe. *A Large Carnivore Initiative for Europe Report  
456 Prepared for the European Commission (Contract 070307/2013/654446/SER/B3)*.
- 457 Boitani, L., & Linnell, J. D. C. (2015). Bringing large mammals back: large carnivores

- 458 in Europe. In *Rewilding European Landscapes* (pp. 67–84). Springer, Cham.
- 459 Carter, N. H., & Linnell, J. D. C. (2016). Co-adaptation is key to coexisting with large  
460 carnivores. *Trends in Ecology & Evolution*, *31*(8), 575–578.
- 461 Chapron, G., Kaczensky, P., Linnell, J. D. C., von Arx, M., Huber, D., Andren, H.,  
462 Lopez-Bao, J. V., Adamec, M., Alvares, F., Anders, O., Bal iauskas, L., Balys, V.,  
463 Bed , P., Bego, F., Blanco, J. C., Breitenmoser, U., Broseth, H., Bufka, L.,  
464 Bunikyte, R., ... Boitani, L. (2014). Recovery of large carnivores in Europe's  
465 modern human-dominated landscapes. *Science*, *346*(6216), 1517–1519.  
466 <https://doi.org/10.1126/science.1257553>
- 467 Cimatti, M., Ranc, N., Benítez-López, A., Maiorano, L., Boitani, L., Cagnacci, F.,  
468 Čengić, M., Ciucci, P., Huijbregts, M. A. J., & Krofel, M. (2021). Large carnivore  
469 expansion in Europe is associated with human population density and land cover  
470 changes. *Diversity and Distributions*, *27*(4), 602–617.
- 471 Dar, N. I., Minhas, R. A., Zaman, Q., & Linkie, M. (2009). Predicting the patterns,  
472 perceptions and causes of human–carnivore conflict in and around Machiara  
473 National Park, Pakistan. *Biological Conservation*, *142*(10), 2076–2082.
- 474 Dickman, A. J. (2010). Complexities of conflict: the importance of considering social  
475 factors for effectively resolving human–wildlife conflict. *Animal Conservation*,  
476 *13*(5), 458–466.
- 477 Eklund, A., López-Bao, J. V., Tourani, M., Chapron, G., & Frank, J. (2017). Limited  
478 evidence on the effectiveness of interventions to reduce livestock predation by  
479 large carnivores. *Scientific Reports*, *7*(1), 2097.
- 480 Fernandez-Gil, A., Naves, J., Ordiz, A., Quevedo, M., Revilla, E., & Delibes, M.

- 481 (2016). Conflict misleads large carnivore management and conservation: brown  
482 bears and wolves in Spain. *PLoS One*, *11*(3).
- 483 Frank, J., & Eklund, A. (2017). Poor construction, not time, takes its toll on subsidised  
484 fences designed to deter large carnivores. *PloS One*, *12*(4), e0175211.
- 485 Garrote, G., López, G., Gil-Sánchez, J. M., Rojas, E., Ruiz, M., Bueno, J. F., de Lillo,  
486 S., Rodriguez-Siles, J., Martín, J. M., & Pérez, J. (2013). Human–felid conflict as a  
487 further handicap to the conservation of the critically endangered Iberian lynx.  
488 *European Journal of Wildlife Research*, *59*(2), 287–290.
- 489 Giannuzzi-Savelli, B., Antonelli, F., & Boitani, L. (1997). Livestock subsidy systems  
490 and reform proposal to benefit large carnivore conservation. *Istituto Di Ecologia*  
491 *Applicata, Roma*.
- 492 Hovardas, T. (2018). Addressing human dimensions in large carnivore conservation and  
493 management: Insights from environmental social science and social psychology. In  
494 *Large Carnivore Conservation and Management* (pp. 3–18). Routledge.
- 495 Hovardas, T., & Marsden, K. (2018). Good practice in large carnivore conservation and  
496 management: Insights from the EU Platform on Coexistence between People and  
497 Large Carnivores. In *Large Carnivore Conservation and Management* (pp. 314–  
498 337). Routledge.
- 499 Imbert, C., Caniglia, R., Fabbri, E., Milanesi, P., Randi, E., Serafini, M., Torretta, E., &  
500 Meriggi, A. (2016). Why do wolves eat livestock?: Factors influencing wolf diet in  
501 northern Italy. *Biological Conservation*, *195*, 156–168.
- 502 Janeiro-Otero, A., Newsome, T. M., Van Eeden, L. M., Ripple, W. J., & Dormann, C. F.  
503 (2020). Grey wolf (*Canis lupus*) predation on livestock in relation to prey

- 504 availability. *Biological Conservation*, 243, 108433.
- 505 Kaczensky, P. (1999). Large carnivore depredation on livestock in Europe. *Ursus*, 59–  
506 71.
- 507 Khorozyan, I., & Waltert, M. (2019). How long do anti-predator interventions remain  
508 effective? Patterns, thresholds and uncertainty. *Royal Society Open Science*, 6(9),  
509 190826.
- 510 Khorozyan, I., & Waltert, M. (2020). Variation and conservation implications of the  
511 effectiveness of anti-bear interventions. *Scientific Reports*, 10(1), 1–9.
- 512 Linnell, J. D. C. (2013). From conflict to coexistence: insights from multi-disciplinary  
513 research into the relationships between people, large carnivores and institutions.  
514 *Istituto Di Ecologia Applicata, Rome*.
- 515 Linnell, J. D. C., Smith, M. E., Odden, J., Kaczensky, P., & Swenson, J. E. (1996).  
516 Strategies for the reduction of carnivore-livestock conflicts: a review. *Nina*  
517 *Oppdragsmelding*, 443(1), 188.
- 518 Linnell, J., Salvatori, V., & Boitani, L. (2008). Guidelines for population level  
519 management plans for large carnivores in Europe. *A Large Carnivore Initiative for*  
520 *Europe Report Prepared for the European Commission (Contract*  
521 *070501/2005/424162/MAR/B2)*, 83.
- 522 López-Bao, J. V., Bruskotter, J., & Chapron, G. (2017). Finding space for large  
523 carnivores. *Nature Ecology & Evolution*, 1(5), 1–2.
- 524 Majjić, A., & Krofel, M. (2015). *Defining, preventing, and reacting to problem bear*  
525 *behaviour in Europe*. Technical Report. Institute of Applied Ecology (Rome, Italy)
- 526 Melzheimer, J., Heinrich, S. K., Wasiolka, B., Mueller, R., Thalwitzer, S., Palmegiani,

- 527 I., Weigold, A., Portas, R., Roeder, R., & Krofel, M. (2020). Communication hubs  
528 of an asocial cat are the source of a human–carnivore conflict and key to its  
529 solution. *Proceedings of the National Academy of Sciences*, *117*(52), 33325–  
530 33333.
- 531 Miller, J. R. B., Stoner, K. J., Cejtin, M. R., Meyer, T. K., Middleton, A. D., & Schmitz,  
532 O. J. (2016). Effectiveness of contemporary techniques for reducing livestock  
533 depredations by large carnivores. *Wildlife Society Bulletin*, *40*(4), 806–815.
- 534 Musiani, M., Mamo, C., Boitani, L., Callaghan, C., Gates, C. C., Mattei, L.,  
535 Visalberghi, E., Breck, S., & Volpi, G. (2003). Wolf depredation trends and the use  
536 of fladry barriers to protect livestock in western North America. *Conservation*  
537 *Biology*, *17*(6), 1538–1547.
- 538 Odden, J., Herfindal, I., Linnell, J. D. C., & Andersen, R. (2008). Vulnerability of  
539 domestic sheep to lynx depredation in relation to roe deer density. *The Journal of*  
540 *Wildlife Management*, *72*(1), 276–282.
- 541 Ohrens, O., Santiago-Ávila, F. J., & Treves, A. (2019). The twin challenges of  
542 preventing real and perceived threats to human interests. *Human-Wildlife*  
543 *Interactions: Turning Conflict into Coexistence*, 242–264.
- 544 Ravenelle, J., & Nyhus, P. J. (2017). Global patterns and trends in human–wildlife  
545 conflict compensation. *Conservation Biology*, *31*(6), 1247–1256.
- 546 Ripple, W. J., Estes, J. A., Beschta, R. L., Wilmers, C. C., Ritchie, E. G., Hebblewhite,  
547 M., Berger, J., Elmhagen, B., Letnic, M., Nelson, M. P., Schmitz, O. J., Smith, D.  
548 W., Wallach, A. D., & Wirsing, A. J. (2014). Status and Ecological Effects of the  
549 World’s Largest Carnivores. *Science*, *343*(6167).  
550 <https://doi.org/10.1126/science.1241484>

- 551 Salvatori, V., & Mertens, A. D. (2012). Damage prevention methods in Europe:  
552 experiences from LIFE nature projects. *Hystrix, the Italian Journal of Mammalogy*,  
553 23(1), 73–79.
- 554 Santiago-Avila, F. J., Cornman, A. M., & Treves, A. (2018). Killing wolves to prevent  
555 predation on livestock may protect one farm but harm neighbors. *PLoS One*, 13(1),  
556 e0189729.
- 557 Shivik, J. A., Treves, A., & Callahan, P. (2003). Nonlethal techniques for managing  
558 predation: primary and secondary repellents. *Conservation Biology*, 17(6), 1531–  
559 1537.
- 560 Towns, L., Derocher, A. E., Stirling, I., Lunn, N. J., & Hedman, D. (2009). Spatial and  
561 temporal patterns of problem polar bears in Churchill, Manitoba. *Polar Biology*,  
562 32(10), 1529–1537.
- 563 Treves, A., & Karanth, K. U. (2003). Human-carnivore conflict and perspectives on  
564 carnivore management worldwide. *Conservation Biology*, 17(6), 1491–1499.
- 565 Treves, A., Krofel, M., & McManus, J. (2016). Predator control should not be a shot in  
566 the dark. *Frontiers in Ecology and the Environment*, 14(7), 380–388.
- 567 Treves, A., Krofel, M., Ohrens, O., & Van Eeden, L. M. (2019). Predator control needs  
568 a standard of unbiased randomized experiments with cross-over design. *Frontiers*  
569 *in Ecology and Evolution*, 7, 462.
- 570 Treves, A., Martin, K. A., Wydeven, A. P., & Wiedenhoft, J. E. (2011). Forecasting  
571 environmental hazards and the application of risk maps to predator attacks on  
572 livestock. *BioScience*, 61(6), 451–458.
- 573 Treves, A., Naughton-Treves, L., Harper, E. K., Mladenoff, D. J., Rose, R. A., Sickley,



574 T. A., & Wydeven, A. P. (2004). Predicting human-carnivore conflict: a spatial  
575 model derived from 25 years of data on wolf predation on livestock. *Conservation*  
576 *Biology*, 18(1), 114–125.

577 Treves, A., Wallace, R. B., & White, S. (2009). Participatory planning of interventions  
578 to mitigate human–wildlife conflicts. *Conservation Biology*, 23(6), 1577–1587.

579 Van Eeden, L. M., Crowther, M. S., Dickman, C. R., Macdonald, D. W., Ripple, W. J.,  
580 Ritchie, E. G., & Newsome, T. M. (2018). Managing conflict between large  
581 carnivores and livestock. *Conservation Biology*, 32(1), 26–34.

582 van Eeden, L. M., Eklund, A., Miller, J. R. B., Lopez-Bao, J. V., Chapron, G., Cejtin,  
583 M. R., Crowther, M. S., Dickman, C. R., Frank, J., & Kropfel, M. (2018). Carnivore  
584 conservation needs evidence-based livestock protection. *PLoS Biology*, 16(9),  
585 e2005577.

586 Woodroffe, R., Thirgood, S., & Rabinowitz, A. (2005). *People and wildlife, conflict or*  
587 *co-existence?* (Issue 9). Cambridge University Press.

588

589

590

591

592

593

594 Table 1. Number of completed projects including given damage mitigation method  
 595 (DMM), per species and overall, as well as the proportion of projects including given  
 596 DMM (%).

| DMM                                             | Grey Wolf       |       | Brown Bear      |       | Eurasian Lynx  |        | Overall         |       |
|-------------------------------------------------|-----------------|-------|-----------------|-------|----------------|--------|-----------------|-------|
|                                                 | $N_{proj} = 34$ |       | $N_{proj} = 59$ |       | $N_{proj} = 5$ |        | $N_{proj} = 74$ |       |
|                                                 | $N_{proj}$      | %     | $N_{proj}$      | %     | $N_{proj}$     | %      | $N_{proj}$      | %     |
| Information dissemination                       | 32              | 94.12 | 50              | 84.75 | 5              | 100.00 | 68              | 91.89 |
| Damage Compensation                             | 14              | 41.18 | 26              | 44.07 | 1              | 20.00  | 32              | 43.24 |
| Electric Fences                                 | 14              | 41.18 | 28              | 47.46 | 4              | 80.00  | 35              | 47.30 |
| Improvement of agricultural practices           | 1               | 2.94  | 6               | 10.17 | 1              | 20.00  | 6               | 8.11  |
| Increasing food availability                    | 7               | 20.59 | 21              | 35.59 | 1              | 20.00  | 25              | 33.78 |
| LCET                                            | 0               | 0.00  | 10              | 16.95 | 0              | 0.00   | 10              | 13.51 |
| Livestock guarding dogs (LGD)                   | 12              | 35.29 | 13              | 22.03 | 1              | 20.00  | 22              | 29.73 |
| Physical barriers                               | 3               | 8.82  | 11              | 18.64 | 0              | 0.00   | 14              | 18.92 |
| Predator removal                                | 1               | 2.94  | 1               | 1.69  | 0              | 0.00   | 2               | 2.70  |
| Preventing access to anthropogenic food sources | 1               | 2.94  | 6               | 10.17 | 0              | 0.00   | 6               | 8.11  |
| Shepherds                                       | 3               | 8.82  | 5               | 8.47  | 0              | 0.00   | 8               | 10.81 |
| Visual and sound deterrents                     | 1               | 2.94  | 1               | 1.69  | 0              | 0.00   | 2               | 2.70  |

597

598

599

600

601

602

603

604 Table 2. Evaluation of damage mitigation methods (DMMs) based on perceived and  
 605 functional effectiveness.

| Highly Effective                                      | Effective                                             | Mixed Results                    | Not Effective        |
|-------------------------------------------------------|-------------------------------------------------------|----------------------------------|----------------------|
| Electric fences (P+F)                                 | Physical barriers (P+F)                               | Increasing food availability (P) | LCET (P)             |
| Visual and sounds deterrents (P+F)                    | Damage Compensation (P)                               | Information dissemination (P)    | Predator Removal (F) |
| Livestock guarding dogs (LGD) (P)                     | Preventing access to anthropogenic food resources (P) |                                  |                      |
| Shepherds (P)                                         | Livestock guarding dogs (F)                           |                                  |                      |
| Preventing access to anthropogenic food resources (F) |                                                       |                                  |                      |

606 (P) – DMM only measured with perceived effectiveness; (F) - DMM only measured with functional effectiveness;

607 (P+F) – DMM measured with the two effectiveness categories.

608

609

610

611

612

613

614

615

616

617

618 **Figure Legends**

619 **Figure 1.** Number of LIFE projects including damage mitigation methods (DMM) per  
620 country, concluded and ongoing (n = 87). \* The number of projects is much higher for  
621 Italy and Spain (n=25, for each of them)

622 **Figure 2.** Measure of functional and perceived effectiveness (quantitative and  
623 qualitative assessments, respectively) of each damage mitigation method (DMM). An  
624 observation corresponds to a DMM measured within a project.

625

626 **Figure 1**

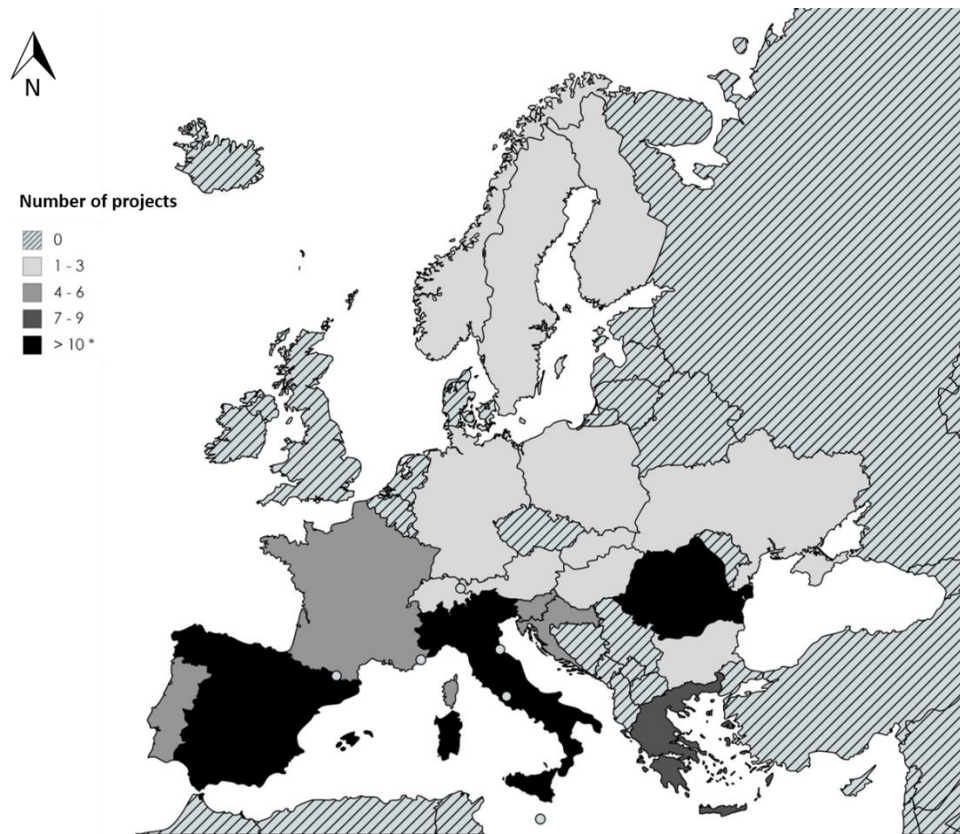

627

628

629

630

631 **Figure 2**

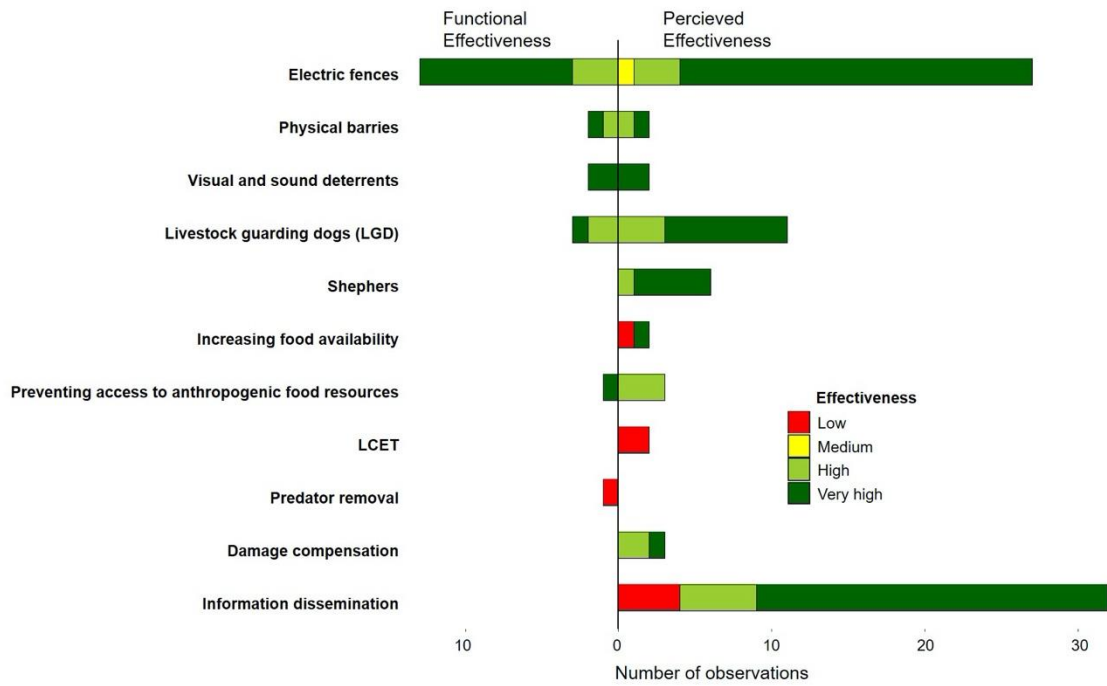

632

633
